# Supplementary material for: Tris(dialkylamino)cyclopropenium dialkylphosphate ionic liquids as lubricants
Source: Royal Society of Chemistry journal article supplement (doi:10.1039/d2cp05109e), 2022-12-22
Supplement: d2cp05109e1.pdf [file d2cp05109e1.pdf]

## SUPPORTING INFORMATION

### Tris(dialkylamino)cyclopropenium dialkylphosphate ionic liquids as lubricants

Owen J. Curnow,<sup>\*a</sup> Rathiga Senthoooran<sup>a</sup> and Anthony E. Somers<sup>\*b</sup>

<sup>a</sup> School of Physical and Chemical Sciences, University of Canterbury, Private Bag 4800, Christchurch 8140, New Zealand

<sup>b</sup> Institute for Frontier Materials, Deakin University, Geelong, Victoria 3220, Australia

Corresponding Author's email: owen.curnow@canterbury.ac.nz

| Contents                                                                                                                  | Page |
|---------------------------------------------------------------------------------------------------------------------------|------|
| <b>Table S1.</b> Uncorrected density data for TDAC BEHP ionic liquids. $u(\rho) = 0.00005 \text{ g}\cdot\text{cm}^{-3}$ . | S1   |
| <b>Table S2.</b> Corrected density data for TDAC BEHP ionic liquids. $u(\rho) = 0.00010 \text{ g}\cdot\text{cm}^{-3}$ .   | S2   |
| <b>Table S3.</b> Density fitting parameters for the corrected data for TDAC ionic liquids.                                | S2   |
| <b>Table S4.</b> Molar volumes ( $\text{cm}^3\cdot\text{mol}^{-1}$ ) for TDAC BEHP ILs.                                   | S2   |
| <b>Table S5.</b> Viscosity data for TDAC BEHP ILs.                                                                        | S2   |
| <b>Table S6.</b> VFT and Arrhenius viscosity fit parameters for TDAC BEHP ILs.                                            | S3   |
| <b>Figure S1.</b> (a) Fragility plot for TDAC BEHP ILs; (b) Expanded view.                                                | S3   |
| <b>Table S7.</b> Conductivity data for TDAC BEHP ILs.                                                                     | S3   |
| <b>Table S8.</b> VFT and Arrhenius conductivity fit parameters for TDAC BEHP ILs.                                         | S4   |
| <b>Table S9.</b> Molar conductivity data for TDAC BEHP ILs.                                                               | S4   |

**Table S1.** Uncorrected density data for TDAC BEHP ionic liquids.  $u(\rho) = 0.00005 \text{ g}\cdot\text{cm}^{-3}$ .

| Compound                                                | Density ( $\text{g}\cdot\text{cm}^{-3}$ ) |          |          |          |          |          |          |          |          |
|---------------------------------------------------------|-------------------------------------------|----------|----------|----------|----------|----------|----------|----------|----------|
|                                                         | 20 °C                                     | 25 °C    | 30 °C    | 40 °C    | 50 °C    | 60 °C    | 70 °C    | 80 °C    | 90 °C    |
| [C <sub>3</sub> (NEt <sub>2</sub> ) <sub>3</sub> ]BEHP  | 0.979692                                  | 0.976001 | 0.973055 | 0.96641  | 0.959869 | 0.95340  | 0.946925 | 0.940459 | 0.934012 |
| [C <sub>3</sub> (NBuMe) <sub>3</sub> ]BEHP              | 0.963887                                  | 0.960549 | 0.957208 | 0.950525 | 0.944023 | 0.937523 | 0.931013 | 0.924505 | 0.917955 |
| [C <sub>3</sub> (NPr <sub>2</sub> ) <sub>3</sub> ]BEHP  | 0.960237                                  | 0.956924 | 0.953622 | 0.947041 | 0.940477 | 0.933810 | 0.927600 | 0.921199 | 0.914814 |
| [C <sub>3</sub> (NBu <sub>2</sub> ) <sub>3</sub> ]BEHP  | 0.943743                                  | 0.940050 | 0.937008 | 0.930291 | 0.923573 | 0.917054 | 0.910504 | 0.903976 | 0.897466 |
| [C <sub>3</sub> (NHex <sub>2</sub> ) <sub>3</sub> ]BEHP | 0.919530                                  | 0.916203 | 0.912881 | 0.906244 | 0.89967  | 0.893045 | 0.886403 | 0.879765 | 0.873327 |
| [C <sub>3</sub> (NDec <sub>2</sub> ) <sub>3</sub> ]BEHP | 0.903770                                  | 0.900476 | 0.897202 | 0.890694 | 0.884296 | 0.877989 | 0.871677 | 0.865410 | 0.859146 |

**Table S2.** Corrected density data for TDAC BEHP ionic liquids.  $u(\rho) = 0.00010 \text{ g}\cdot\text{cm}^{-3}$ .

| Compound                                                | Density ( $\text{g}\cdot\text{cm}^{-3}$ ) |         |         |         |         |         |         |         |         |
|---------------------------------------------------------|-------------------------------------------|---------|---------|---------|---------|---------|---------|---------|---------|
|                                                         | 20 °C                                     | 25 °C   | 30 °C   | 40 °C   | 50 °C   | 60 °C   | 70 °C   | 80 °C   | 90 °C   |
| [C <sub>3</sub> (NEt <sub>2</sub> ) <sub>3</sub> ]BEHP  | 0.97900                                   | 0.97536 | 0.97248 | 0.96606 | 0.95974 | 0.95337 | 0.94692 | 0.94046 | 0.93401 |
| [C <sub>3</sub> (NBuMe) <sub>3</sub> ]BEHP              | 0.96318                                   | 0.95987 | 0.95658 | 0.95007 | 0.94378 | 0.93744 | 0.93100 | 0.92450 | 0.91795 |
| [C <sub>3</sub> (NPr <sub>2</sub> ) <sub>3</sub> ]BEHP  | 0.95950                                   | 0.95620 | 0.95291 | 0.94640 | 0.93999 | 0.93355 | 0.92751 | 0.92118 | 0.91481 |
| [C <sub>3</sub> (NBu <sub>2</sub> ) <sub>3</sub> ]BEHP  | 0.94301                                   | 0.93933 | 0.93630 | 0.92966 | 0.92311 | 0.91681 | 0.91042 | 0.90396 | 0.89747 |
| [C <sub>3</sub> (NHex <sub>2</sub> ) <sub>3</sub> ]BEHP | 0.91879                                   | 0.91547 | 0.91216 | 0.90558 | 0.89914 | 0.89273 | 0.88627 | 0.87973 | 0.87332 |
| [C <sub>3</sub> (NDec <sub>2</sub> ) <sub>3</sub> ]BEHP | 0.90306                                   | 0.89978 | 0.89654 | 0.89016 | 0.88396 | 0.87783 | 0.87162 | 0.86540 | 0.85915 |

**Table S3.** Density fitting parameters for the corrected data for TDAC BEHP ionic liquids.<sup>a</sup>

| Compound                                                | $b \times 10^4$ | a      |
|---------------------------------------------------------|-----------------|--------|
| [C <sub>3</sub> (NEt <sub>2</sub> ) <sub>3</sub> ]BEHP  | 6.39            | 1.1662 |
| [C <sub>3</sub> (NBuMe) <sub>3</sub> ]BEHP              | 6.43            | 1.1516 |
| [C <sub>3</sub> (NPr <sub>2</sub> ) <sub>3</sub> ]BEHP  | 6.37            | 1.1460 |
| [C <sub>3</sub> (NBu <sub>2</sub> ) <sub>3</sub> ]BEHP  | 6.47            | 1.1323 |
| [C <sub>3</sub> (NHex <sub>2</sub> ) <sub>3</sub> ]BEHP | 6.49            | 1.1088 |
| [C <sub>3</sub> (NDec <sub>2</sub> ) <sub>3</sub> ]BEHP | 6.25            | 1.0860 |

<sup>a</sup> density is fit to  $\rho = a - bT$ .**Table S4.** Molar volumes ( $\text{cm}^3\cdot\text{mol}^{-1}$ ) for TDAC BEHP ILs

| Compound                                                | MW      | 293 K | 298 K | 303 K | 313 K | 323 K | 333 K | 343 K | 353 K | 363 K |
|---------------------------------------------------------|---------|-------|-------|-------|-------|-------|-------|-------|-------|-------|
| [C <sub>3</sub> (NEt <sub>2</sub> ) <sub>3</sub> ]BEHP  | 573.84  | 586   | 588   | 590   | 594   | 598   | 602   | 606   | 610   | 614   |
| [C <sub>3</sub> (NBuMe) <sub>3</sub> ]BEHP              | 615.92  | 638   | 640   | 643   | 647   | 652   | 656   | 661   | 665   | 670   |
| [C <sub>3</sub> (NPr <sub>2</sub> ) <sub>3</sub> ]BEHP  | 658.00  | 685   | 688   | 690   | 695   | 700   | 705   | 709   | 714   | 719   |
| [C <sub>3</sub> (NBu <sub>2</sub> ) <sub>3</sub> ]BEHP  | 742.16  | 786   | 790   | 792   | 798   | 804   | 809   | 815   | 821   | 827   |
| [C <sub>3</sub> (NHex <sub>2</sub> ) <sub>3</sub> ]BEHP | 910.48  | 990   | 994   | 997   | 1005  | 1012  | 1020  | 1027  | 1035  | 1043  |
| [C <sub>3</sub> (NDec <sub>2</sub> ) <sub>3</sub> ]BEHP | 1247.12 | 1380  | 1385  | 1390  | 1400  | 1410  | 1420  | 1431  | 1441  | 1452  |

**Table S5.** Viscosity data for TDAC BEHP ILs.

| Compound                                                | Viscosity/mPa·s |       |       |       |       |       |       |       |       |
|---------------------------------------------------------|-----------------|-------|-------|-------|-------|-------|-------|-------|-------|
|                                                         | 293 K           | 298 K | 303 K | 313 K | 323 K | 333 K | 343 K | 353 K | 363 K |
| [C <sub>3</sub> (NEt <sub>2</sub> ) <sub>3</sub> ]BEHP  | 739             | 494   | 338   | 173   | 94    | 56.7  | 36.5  | 24.7  | 17.9  |
| [C <sub>3</sub> (NBuMe) <sub>3</sub> ]BEHP              | 950             | 645   | 450   | 227   | 130   | 77.4  | 49.7  | 33.3  | 23.4  |
| [C <sub>3</sub> (NPr <sub>2</sub> ) <sub>3</sub> ]BEHP  | 2517            | 1560  | 1017  | 479   | 247   | 138   | 83.1  | 52.0  | 34.2  |
| [C <sub>3</sub> (NBu <sub>2</sub> ) <sub>3</sub> ]BEHP  | 2238            | 1427  | 939   | 446   | 231   | 131   | 78.1  | 51.0  | 34.7  |
| [C <sub>3</sub> (NHex <sub>2</sub> ) <sub>3</sub> ]BEHP | 3088            | 2041  | 1255  | 558   | 281   | 158   | 95.8  | 60.4  | 43.0  |
| [C <sub>3</sub> (NDec <sub>2</sub> ) <sub>3</sub> ]BEHP | 1086            | 757   | 540   | 285   | 164   | 104   | 68.4  | 47.3  | 33.9  |

**Table S6.** VFT and Arrhenius viscosity fit parameters for TDAC BEHP ILs.<sup>a</sup>

| Compound                                                | Parameter                       |            |              |       |                     |                            |                                  |
|---------------------------------------------------------|---------------------------------|------------|--------------|-------|---------------------|----------------------------|----------------------------------|
|                                                         | $\eta_0 \times 10^2$<br>(mPa·s) | $B$<br>(K) | $T_0$<br>(K) | $D^b$ | $\delta$<br>(mPa·s) | $A \times 10^6$<br>(mPa·s) | $E_a$<br>(kJ·mol <sup>-1</sup> ) |
| [C <sub>3</sub> (NEt <sub>2</sub> ) <sub>3</sub> ]BEHP  | 2.90                            | 1210       | 174          | 6.96  | 1.2                 | 2.34                       | 47                               |
| [C <sub>3</sub> (NBuMe) <sub>3</sub> ]BEHP              | 2.74                            | 1329       | 166          | 8.00  | 2.6                 | 3.60                       | 47                               |
| [C <sub>3</sub> (NPr <sub>2</sub> ) <sub>3</sub> ]BEHP  | 2.39                            | 1376       | 174          | 7.90  | 6.1                 | 4.87                       | 54                               |
| [C <sub>3</sub> (NBu <sub>2</sub> ) <sub>3</sub> ]BEHP  | 2.30                            | 1403       | 171          | 8.21  | 1.1                 | 7.32                       | 53                               |
| [C <sub>3</sub> (NHex <sub>2</sub> ) <sub>3</sub> ]BEHP | 3.19                            | 1327       | 178          | 7.47  | 10.1                | 4.53                       | 55                               |
| [C <sub>3</sub> (NDec <sub>2</sub> ) <sub>3</sub> ]BEHP | 6.82                            | 1202       | 169          | 7.13  | 3.9                 | 8.63                       | 44                               |

<sup>a</sup> Data was fit to the VFT ( $\eta = \eta_0 \cdot \exp(B/(T - T_0))$ ) and Arrhenius ( $\eta = A \cdot \exp(E_a/RT)$ ) equations. <sup>b</sup>  $D = B/T_0$ .

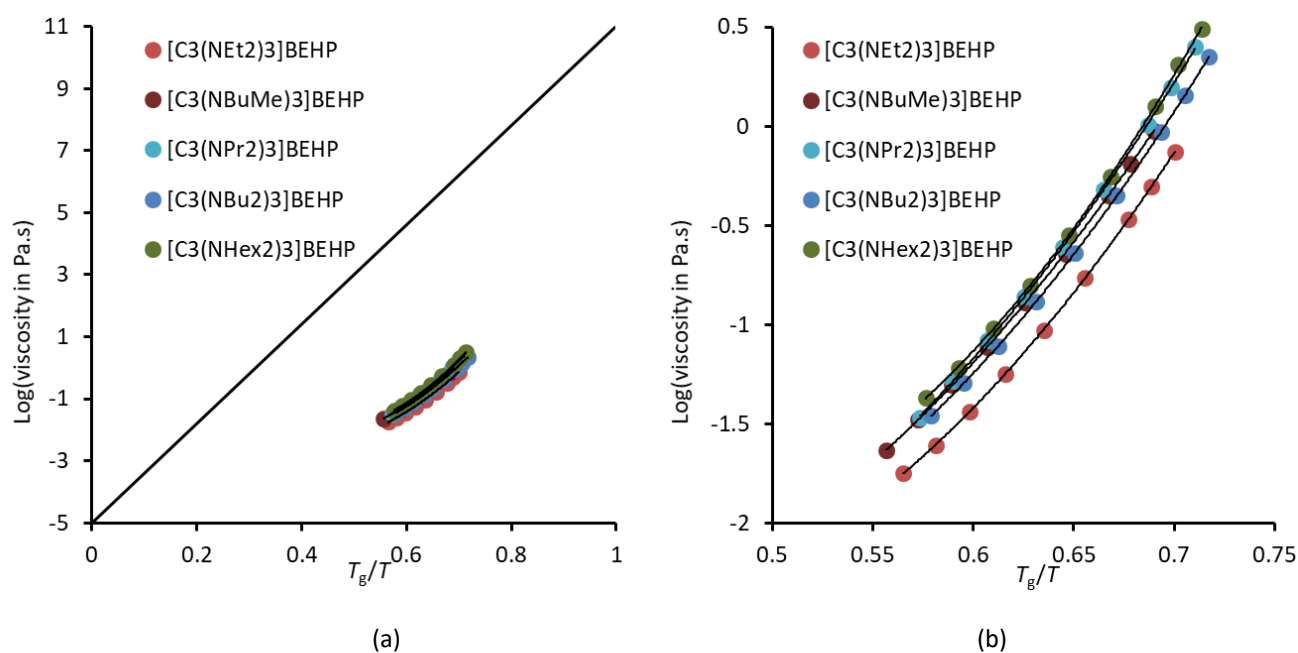**Figure S1.** (a) Fragility plot for TDAC BEHP ILs; (b) Expanded view.**Table S7.** Conductivity data for TDAC BEHP ILs.

| Compound                                                | Conductivity/mS·cm <sup>-1</sup> × 10 <sup>2</sup> |       |       |       |       |       |       |       |       |
|---------------------------------------------------------|----------------------------------------------------|-------|-------|-------|-------|-------|-------|-------|-------|
|                                                         | 293 K                                              | 298 K | 303 K | 313 K | 323 K | 333 K | 343 K | 353 K | 363 K |
| [C <sub>3</sub> (NEt <sub>2</sub> ) <sub>3</sub> ]BEHP  | 8.92                                               | 12.4  | 16.9  | 29    | 45.8  | 67.1  | 92    | 121   | 152   |
| [C <sub>3</sub> (NBuMe) <sub>3</sub> ]BEHP              | 5.24                                               | 7.4   | 10.1  | 17.5  | 27.8  | 41.1  | 57.9  | 77.2  | 98.1  |
| [C <sub>3</sub> (NPr <sub>2</sub> ) <sub>3</sub> ]BEHP  | 8.5                                                | 11.8  | 15.8  | 26.7  | 41.5  | 59.4  | 80.2  | 103   | 127   |
| [C <sub>3</sub> (NBu <sub>2</sub> ) <sub>3</sub> ]BEHP  | 0.95                                               | 1.4   | 2.02  | 3.91  | 6.85  | 11.1  | 16.8  | 23.8  | 32.4  |
| [C <sub>3</sub> (NHex <sub>2</sub> ) <sub>3</sub> ]BEHP | 0.7                                                | 0.99  | 1.37  | 2.43  | 3.97  | 6.06  | 8.76  | 12.2  | 15.8  |
| [C <sub>3</sub> (NDec <sub>2</sub> ) <sub>3</sub> ]BEHP | 0.22                                               | 0.32  | 0.44  | 0.78  | 1.29  | 1.98  | 2.89  | 4.01  | 5.34  |

**Table S8.** VFT and Arrhenius conductivity fit parameters for TDAC BEHP ILs.<sup>a</sup>

| Compound                                                | Parameter                                   |            |              |       |                      |                                           |                                  |
|---------------------------------------------------------|---------------------------------------------|------------|--------------|-------|----------------------|-------------------------------------------|----------------------------------|
|                                                         | $\sigma_{\infty}$<br>(mS·cm <sup>-1</sup> ) | $B$<br>(K) | $T_0$<br>(K) | $D^b$ | $\Delta \times 10^3$ | $A \times 10^4$<br>(mS·cm <sup>-1</sup> ) | $E_a$<br>(kJ·mol <sup>-1</sup> ) |
| [C <sub>3</sub> (NEt <sub>2</sub> ) <sub>3</sub> ]BEHP  | 44.4                                        | 514        | 211          | 2.4   | 3.2                  | 24                                        | 36                               |
| [C <sub>3</sub> (NBuMe) <sub>3</sub> ]BEHP              | 44.2                                        | 610        | 203          | 3.0   | 3.4                  | 23                                        | 37                               |
| [C <sub>3</sub> (NPr <sub>2</sub> ) <sub>3</sub> ]BEHP  | 24.9                                        | 434        | 217          | 2.0   | 4.7                  | 12                                        | 34                               |
| [C <sub>3</sub> (NBu <sub>2</sub> ) <sub>3</sub> ]BEHP  | 40.3                                        | 795        | 198          | 4.0   | 0.62                 | 95                                        | 45                               |
| [C <sub>3</sub> (NHex <sub>2</sub> ) <sub>3</sub> ]BEHP | 14.8                                        | 776        | 192          | 4.0   | 0.71                 | 8.2                                       | 39                               |
| [C <sub>3</sub> (NDec <sub>2</sub> ) <sub>3</sub> ]BEHP | 6.80                                        | 872        | 183          | 4.8   | 0.29                 | 3.3                                       | 40                               |

<sup>a</sup> Data was fit to the VFT ( $\sigma = \sigma_{\infty} \cdot \exp(-B/(T - T_0))$ ) and Arrhenius ( $\sigma = A \cdot \exp(-E_a/RT)$ ) equations. <sup>b</sup>  $D = B/T_0$ .

**Table S9.** Molar conductivity data for TDAC BEHP ILs.

| Compound                                                | Molar conductivity/mS·cm <sup>2</sup> ·mol <sup>-1</sup> |       |       |       |       |       |       |       |       |
|---------------------------------------------------------|----------------------------------------------------------|-------|-------|-------|-------|-------|-------|-------|-------|
|                                                         | 293 K                                                    | 298 K | 303 K | 313 K | 323 K | 333 K | 343 K | 353 K | 363 K |
| [C <sub>3</sub> (NEt <sub>2</sub> ) <sub>3</sub> ]BEHP  | 52.2                                                     | 73.1  | 99.8  | 172   | 274   | 404   | 558   | 736   | 934   |
| [C <sub>3</sub> (NBuMe) <sub>3</sub> ]BEHP              | 33.4                                                     | 47.4  | 64.8  | 113   | 181   | 270   | 382   | 514   | 657   |
| [C <sub>3</sub> (NPr <sub>2</sub> ) <sub>3</sub> ]BEHP  | 58.2                                                     | 81.1  | 109   | 186   | 290   | 418   | 569   | 737   | 912   |
| [C <sub>3</sub> (NBu <sub>2</sub> ) <sub>3</sub> ]BEHP  | 7.47                                                     | 11.1  | 16    | 31.2  | 55    | 89.8  | 137   | 195   | 268   |
| [C <sub>3</sub> (NHex <sub>2</sub> ) <sub>3</sub> ]BEHP | 6.93                                                     | 9.84  | 13.7  | 24.4  | 40.2  | 61.8  | 90    | 126   | 165   |
| [C <sub>3</sub> (NDec <sub>2</sub> ) <sub>3</sub> ]BEHP | 3.09                                                     | 4.4   | 6.14  | 11    | 18.2  | 28.1  | 41.3  | 57.8  | 77.5  |
